# Supplementary material
Source: PubMed Central journal article supplement (PMC5206771)
Supplement: Supp_Fig1.pdf [file Supp_Fig1.pdf]

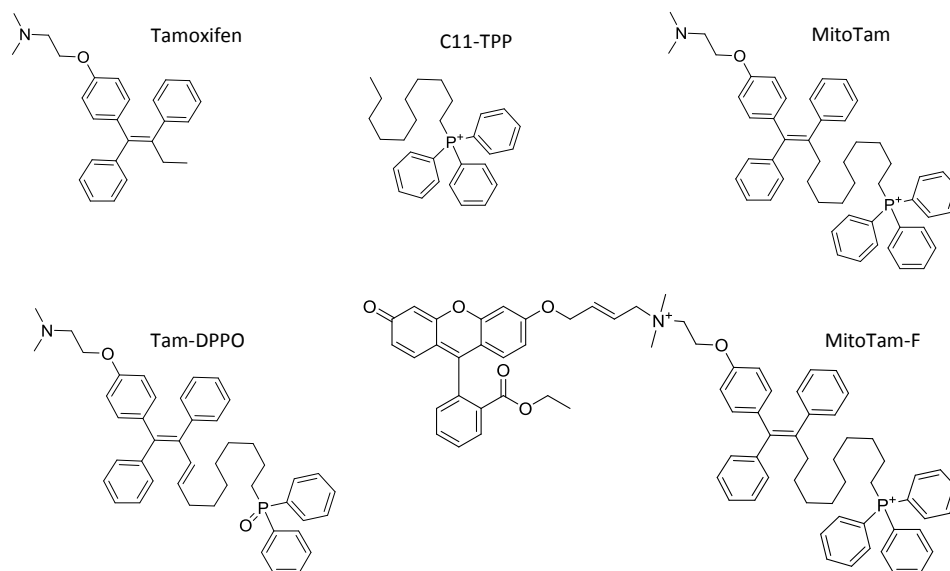

**Figure S1.** Structures of compounds used in the current study. The mitochondria-targeting TPP<sup>+</sup> group is disabled in Tam-DPPO, whereas fluorescein group attached to MitoTam (MitoTam-F) allows direct visualization.
