# Supplementary material
Source: PubMed Central journal article supplement (PMC5206771)
Supplement: Supp_Fig2.pdf [file Supp_Fig2.pdf]

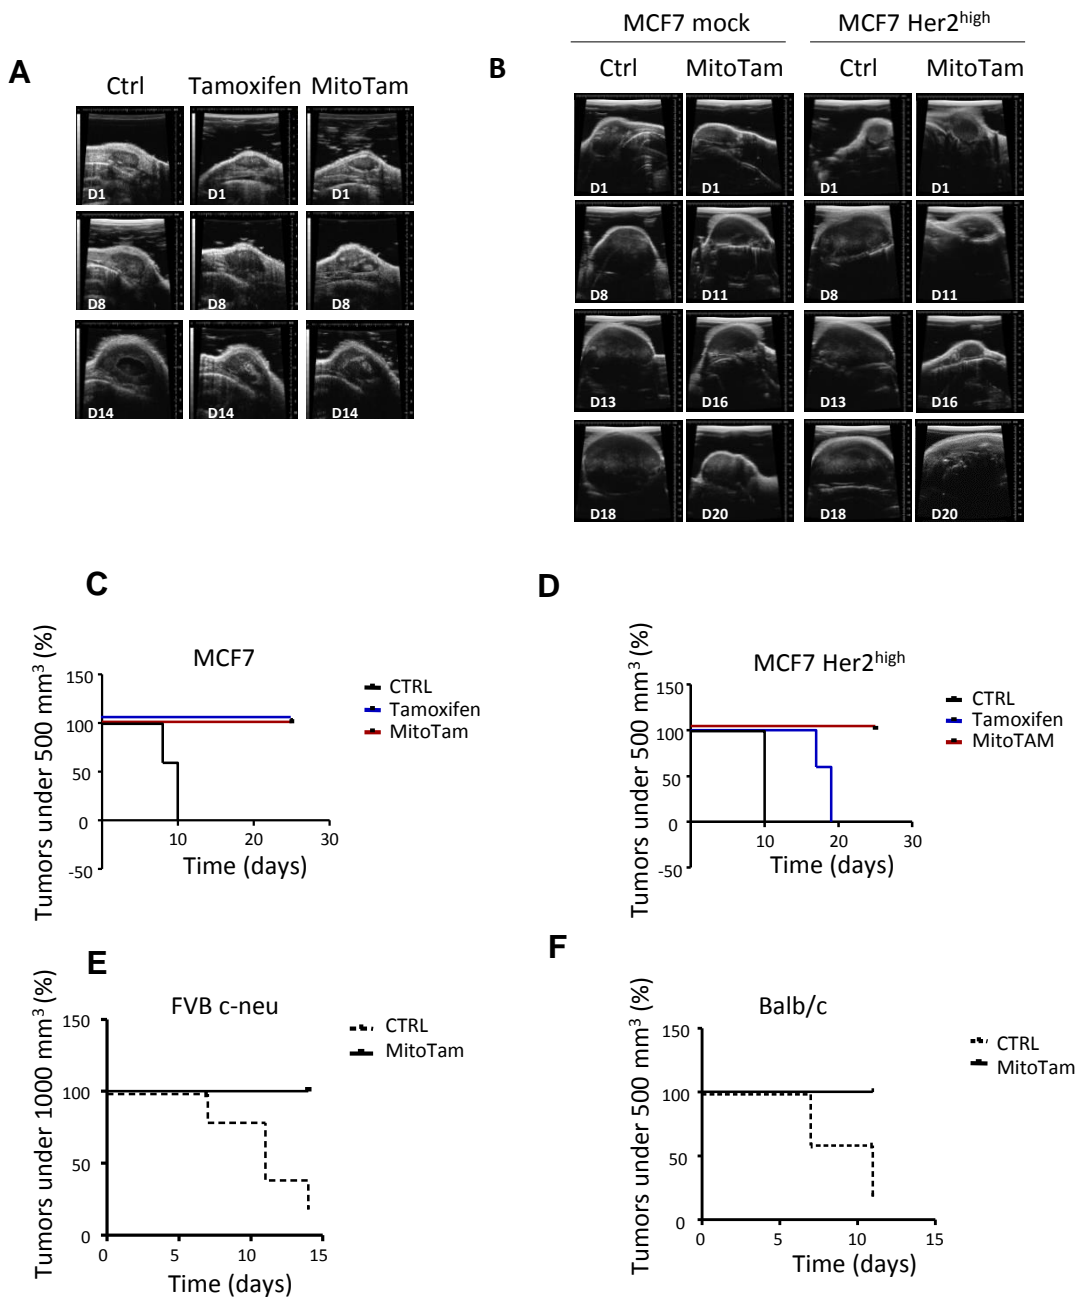

**Figure S2.** (A) Representative USI images of tumors from Fig. 3A. (B) Representative USI images of tumors from Fig. 3B. Percentage of animals reaching the ethical end-point (tumor volume over 500 mm<sup>3</sup> (C), (D) and (F) or 1000 mm<sup>3</sup> (E)). Data in (C) and (D) corresponds to the experiment shown in Fig. 3B, data in (E) corresponds to the experiment in Fig. 3E and graph in (F) corresponds to the experiment shown in Fig. 3F.
