# Supplementary material
Source: PubMed Central journal article supplement (PMC5206771)

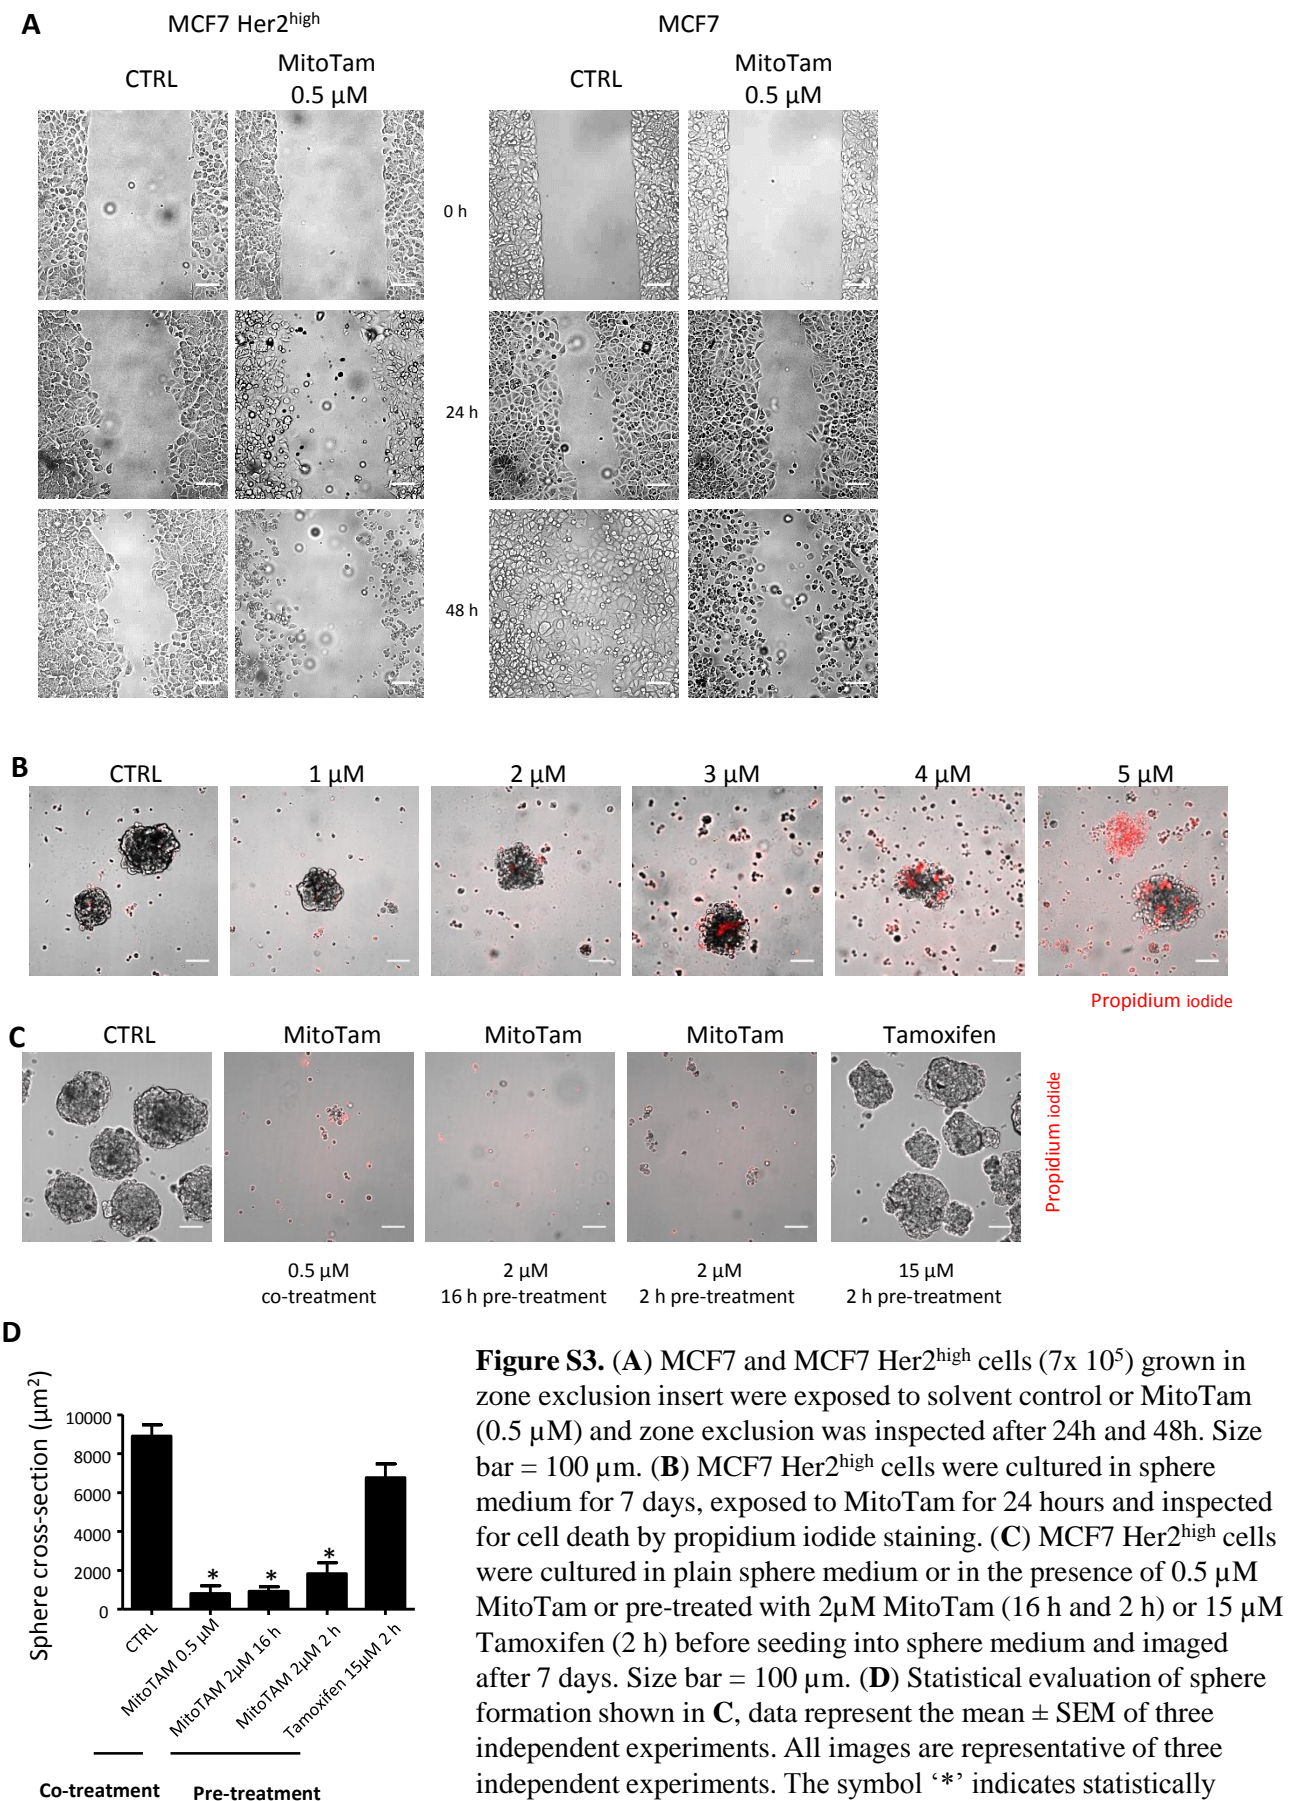

Supplement: Supp_Fig3.pdf [file Supp_Fig3.pdf]
